# Supplementary material for: Beneficial Plant Microorganisms Affect the Endophytic Bacterial Communities of Durum Wheat Roots as Detected by Different Molecular Approaches
Source: PubMed Central journal article supplement (PMC6834690; doi:10.3389/fmicb.2019.02500), 2019-10-31
Supplement: Data_Sheet_1.pdf [file Data_Sheet_1.pdf]

**Table S1.** Estimated sample coverage and alpha diversity indexes of Bacteria (16S rRNA) found in roots of durum wheat (cultivars Odisseo, O, and Saragolla, S) inoculated with either *Lactobacillus plantarum* (O-B, S-B), or *Funneliformis mosseae* (O-M, S-M), or *L. plantarum* and *F. mossae* (O-BM, S-BM). Controls (O, S) refer to plants of durum wheat not inoculated.

| Sample | Good's                        | Number of OTU | Chao1 richness | Abundance-              |                         |
|--------|-------------------------------|---------------|----------------|-------------------------|-------------------------|
|        | Estimated Sample Coverage (%) |               |                | based Coverage Estimate | Shannon diversity index |
| O      | 99.99                         | 164           | 165.2          | 165.1                   | 3.15                    |
| O-B    | 99.92                         | 154           | 156.5          | 158.9                   | 1.75                    |
| O-M    | 99.96                         | 158           | 159.1          | 160.6                   | 2.29                    |
| O-BM   | 99.94                         | 116           | 117.8          | 120.5                   | 1.37                    |
| S      | 99.98                         | 135           | 135.4          | 135.8                   | 3.49                    |
| S-B    | 99.99                         | 156           | 156.8          | 157.4                   | 3.42                    |
| S-M    | 99.97                         | 163           | 164.2          | 165.8                   | 3.53                    |
| S-BM   | 99.92                         | 140           | 142.6          | 143.9                   | 3.41                    |

**Figure S1.** Venn's diagrams showing the number of shared and unique OTU within the roots of durum wheat of Odisseo (panel A) and Saragolla (panel B). O, non-inoculated Odisseo; O-B, Odisseo inoculated with *Lactobacillus plantarum*; O-M, Odisseo inoculated with *Funneliformis mosseae*; O-BM, Odisseo inoculated with *L. plantarum* and *F. mosseae*; S-B, Saragolla inoculated with *L. plantarum*; S-M, Saragolla inoculated with *F. mosseae*; S-BM, Saragolla inoculated with *L. plantarum* and *F. mosseae*.

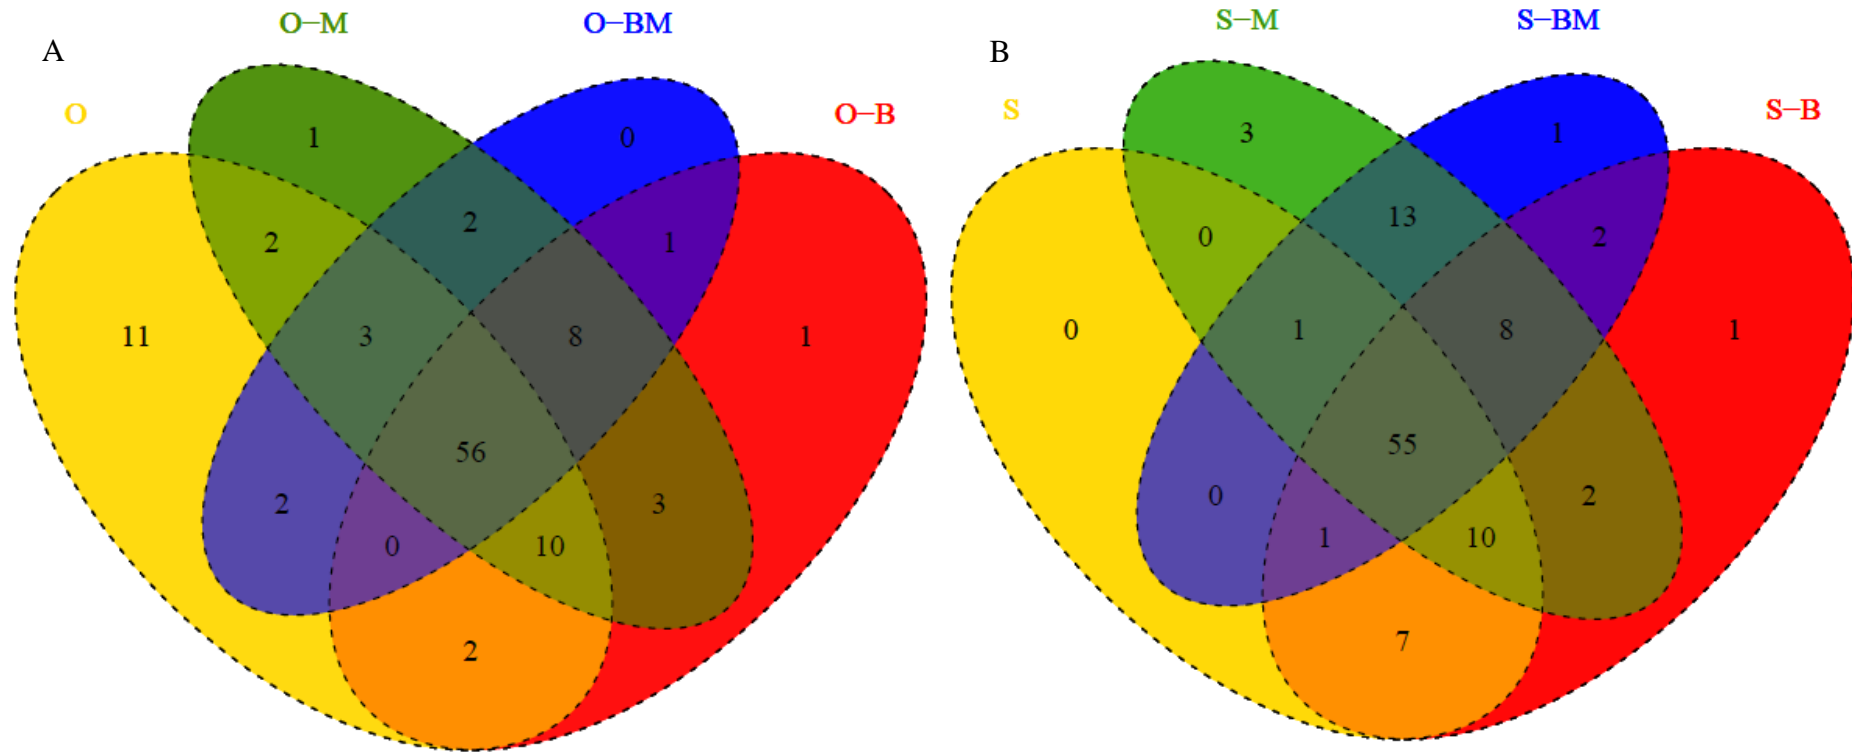

**Table S2.** Relative abundance (%)<sup>a</sup> of bacterial species/genera found through 16S metagenetic analysis of DNA extracted from roots of durum wheat (cultivars Odisseo, O, and Saragolla, S) inoculated with either *Lactobacillus plantarum* (O-B, S-B), or *Funneliformis mosseae* (O-M, S-M), or *L. plantarum* and *F. mosseae* (O-BM, S-BM). Controls (O, S) refer to plant of durum wheat not inoculated.

| <b>Phylum/Family</b>                       | <b>Genus/Species</b>                | <b>O</b> | <b>O-B</b> | <b>O-M</b> | <b>O-BM</b> | <b>S</b> | <b>S-B</b> | <b>S-M</b> | <b>S-BM</b> |
|--------------------------------------------|-------------------------------------|----------|------------|------------|-------------|----------|------------|------------|-------------|
| <b>Actinobacteria/Nocardiaceae</b>         | <i>Rhodococcus erythropolis</i>     | 4.44     | 3.21       | 4.37       | 1.43        | 1.39     | 3.60       | 3.98       | 8.44        |
|                                            | <i>Rhodococcus</i> sp.              | 7.60     | 5.28       | 7.62       | 2.95        | 3.31     | 7.18       | 8.19       | 17.61       |
| <b>Actinobacteria/Microbacteriaceae</b>    | <i>Curtobacterium</i> sp            | 0.13     | 0.03       | 0.02       | 0.04        | 0.35     | 0.07       | 0.74       | 0.06        |
|                                            | <i>Microbacterium</i> sp            | 0.34     | 0.92       | 0.97       | 0.75        | 0.15     | 0.60       | 1.14       | 1.12        |
|                                            | <i>Microbacterium</i>               | 0.16     | 0.06       | 0.07       | 0.01        | 0.12     | 0.10       | 0.01       | 0.05        |
| <b>Actinobacteria/Micrococcaceae</b>       | <i>Arthrobacter</i>                 | 0.78     | 0.15       | 0.20       | 0.01        | 1.00     | 0.53       | 0.05       | 0.07        |
| <b>Actinobacteria/Micromonosporaceae</b>   | <i>Actinoplanes</i>                 | 0.01     | 0.34       | 0.54       | 0.27        | 0.00     | 0.01       | 1.16       | 4.50        |
| <b>Actinobacteria/Propionibacteriaceae</b> | <i>Propionibacterium acnes</i>      | 0.00     | 0.01       | 0.00       | 0.00        | 0.00     | 0.10       | 0.04       | 0.02        |
| <b>Actinobacteria/Pseudonocardiaceae</b>   | <i>Lentzea</i>                      | 0.03     | 0.08       | 0.20       | 0.21        | 0.00     | 0.00       | 0.49       | 1.00        |
|                                            | <i>Pseudonocardiaceae</i>           | 0.00     | 0.01       | 0.03       | 0.06        | 0.00     | 0.00       | 0.19       | 0.29        |
| <b>Actinobacteria/Streptomycetaceae</b>    | <i>Streptomyces europaeiscabiei</i> | 0.43     | 0.30       | 0.40       | 0.94        | 0.02     | 0.12       | 1.45       | 3.41        |
|                                            | <i>Streptomyces galilaeus</i>       | 0.00     | 0.02       | 0.01       | 0.00        | 0.00     | 0.00       | 0.17       | 0.12        |
|                                            | <i>Streptomyces</i> unk             | 0.03     | 0.07       | 0.28       | 0.03        | 0.00     | 0.03       | 0.42       | 0.41        |
|                                            | <i>Algoriphagus</i>                 | 0.29     | 0.03       | 0.03       | 0.00        | 0.22     | 0.15       | 0.00       | 0.02        |
| <b>Bacteroidetes/Cyclobacteriaceae</b>     | <i>Dyadobacter fermentans</i>       | 0.12     | 0.00       | 0.00       | 0.00        | 0.17     | 0.07       | 0.00       | 0.00        |
|                                            | <i>Ohtaekwangia</i>                 | 0.41     | 0.07       | 0.10       | 0.05        | 0.19     | 0.29       | 0.17       | 1.16        |
|                                            | <i>Cytophagales</i>                 | 0.42     | 0.03       | 0.00       | 0.00        | 0.22     | 0.35       | 0.06       | 0.04        |
|                                            | <i>Chryseobacterium</i>             | 0.00     | 0.01       | 0.05       | 0.14        | 0.00     | 0.00       | 0.89       | 0.06        |
| <b>Bacteroidetes/Flavobacteriaceae</b>     | <i>Chitinophaga</i>                 | 0.48     | 0.21       | 0.03       | 0.00        | 2.17     | 1.04       | 1.54       | 0.10        |
|                                            | <i>Niabella ginsengisoli</i>        | 0.01     | 0.00       | 0.00       | 0.02        | 0.02     | 0.01       | 0.23       | 0.00        |
|                                            | <i>Niastella</i> unk                | 0.70     | 0.48       | 0.39       | 0.30        | 0.53     | 0.74       | 1.05       | 2.02        |
| <b>Bacteroidetes/Sphingobacteriaceae</b>   | <i>Pedobacter</i> sp                | 0.40     | 0.03       | 0.03       | 0.01        | 0.18     | 0.10       | 0.01       | 0.01        |

|                                         |                                            |      |      |      |      |       |      |      |      |
|-----------------------------------------|--------------------------------------------|------|------|------|------|-------|------|------|------|
|                                         | <i>Sphingobacterium</i><br>sp              | 0.50 | 0.05 | 0.04 | 0.01 | 0.21  | 0.32 | 0.04 | 0.01 |
| <b>Bacteroidetes</b>                    | <i>Bacteroidetes</i> unk                   | 0.38 | 1.19 | 2.01 | 1.09 | 0.24  | 0.62 | 8.78 | 4.38 |
| <b>Firmicutes/Bacillaceae</b>           | <i>Bacillus</i> sp                         | 0.17 | 0.00 | 0.01 | 0.00 | 0.15  | 0.14 | 0.01 | 0.00 |
| <b>Proteobacteria/Caulobacteraceae</b>  | <i>Asticcacaulis</i>                       | 2.25 | 1.05 | 1.46 | 0.46 | 1.74  | 3.32 | 1.52 | 4.03 |
|                                         | <i>Brevundimonas</i> sp                    | 0.96 | 0.46 | 0.58 | 0.43 | 1.62  | 0.81 | 6.43 | 1.77 |
|                                         | <i>Caulobacter</i>                         | 0.10 | 0.12 | 0.14 | 0.03 | 0.02  | 0.10 | 0.19 | 0.10 |
|                                         | <i>Phenylobacterium</i><br>sp              | 0.29 | 0.05 | 0.05 | 0.03 | 0.19  | 0.48 | 0.11 | 0.13 |
| <b>Proteobacteria/Bradyrhizobiaceae</b> | <i>Bosea</i> sp                            | 0.14 | 0.09 | 0.09 | 0.06 | 0.11  | 0.12 | 0.41 | 0.17 |
|                                         | <i>Bradyrhizobium</i> sp                   | 0.45 | 0.23 | 0.38 | 0.09 | 0.38  | 0.27 | 0.28 | 0.42 |
| <b>Proteobacteria/Hyphomicrobiaceae</b> | <i>Devosia riboflavina</i>                 | 2.03 | 0.48 | 0.69 | 0.51 | 6.66  | 2.23 | 2.97 | 0.97 |
|                                         | <i>Devosia</i> sp                          | 3.61 | 1.91 | 3.24 | 0.88 | 9.62  | 6.17 | 3.11 | 3.03 |
|                                         | <i>Devosia</i> unk                         | 0.50 | 0.03 | 0.24 | 0.01 | 0.33  | 1.04 | 0.09 | 0.11 |
|                                         | <i>Hyphomicrobium</i> sp                   | 0.02 | 0.11 | 0.16 | 0.07 | 0.05  | 0.11 | 0.25 | 0.29 |
| <b>Proteobacteria/Rhizobiaceae</b>      | <i>Rhizobium</i> sp                        | 2.01 | 1.58 | 3.65 | 1.14 | 10.09 | 4.73 | 2.48 | 9.49 |
|                                         | <i>Rhizobium</i> unk                       | 3.61 | 0.56 | 1.07 | 0.56 | 6.64  | 5.10 | 1.72 | 1.50 |
|                                         | <i>Shinella</i><br><i>zoogloeoides</i>     | 0.23 | 0.23 | 0.34 | 0.50 | 0.81  | 0.28 | 0.28 | 0.79 |
|                                         | <i>Sinorhizobium</i><br><i>meliloti</i>    | 0.58 | 0.19 | 0.44 | 0.13 | 0.70  | 0.53 | 0.05 | 0.47 |
|                                         | <i>Rhizobiaceae</i> unk                    | 1.41 | 0.56 | 0.97 | 0.34 | 4.34  | 2.61 | 1.43 | 0.93 |
| <b>Proteobacteria</b>                   | <i>Rhizobiales</i> unk                     | 2.48 | 1.09 | 1.74 | 1.07 | 7.61  | 2.71 | 2.24 | 4.21 |
| <b>Proteobacteria/Rhodospirillaceae</b> | <i>Phaeospirillum</i>                      | 0.15 | 0.04 | 0.08 | 0.02 | 0.46  | 0.11 | 0.14 | 0.00 |
| <b>Proteobacteria/Sphingomonadaceae</b> | <i>Novosphingobium</i> sp                  | 0.00 | 0.01 | 0.02 | 0.00 | 0.12  | 0.00 | 0.69 | 0.60 |
|                                         | <i>Rhizorhapis</i><br><i>suberifaciens</i> | 0.00 | 0.01 | 0.02 | 0.02 | 0.00  | 0.00 | 0.04 | 0.13 |
|                                         | <i>Sphingobium</i><br><i>cloacae</i>       | 0.11 | 0.00 | 0.01 | 0.02 | 0.11  | 0.02 | 0.01 | 0.00 |
|                                         | <i>Sphingobium</i><br><i>yanoikuyae</i>    | 0.08 | 0.03 | 0.03 | 0.00 | 0.31  | 0.20 | 0.00 | 0.00 |
|                                         | <i>Sphingomonas</i><br><i>koreensis</i>    | 0.07 | 0.09 | 0.18 | 0.06 | 0.06  | 0.02 | 2.83 | 0.44 |

|                                          |                                   |       |       |       |       |       |       |       |      |
|------------------------------------------|-----------------------------------|-------|-------|-------|-------|-------|-------|-------|------|
|                                          | <i>Sphingomonas</i> sp            | 0.14  | 0.01  | 0.00  | 0.00  | 0.34  | 0.13  | 0.01  | 0.03 |
|                                          | <i>Sphingopyxis</i> sp            | 0.27  | 0.06  | 0.04  | 0.02  | 0.26  | 0.43  | 0.42  | 0.10 |
| <b>Proteobacteria/Alcaligenaceae</b>     | <i>Achromobacter</i> sp           | 0.04  | 0.10  | 0.06  | 0.10  | 0.00  | 0.06  | 0.00  | 0.91 |
| <b>Proteobacteria/Burkholderiaceae</b>   | <i>Ralstonia</i> sp               | 1.32  | 0.91  | 0.34  | 0.00  | 1.60  | 1.16  | 0.09  | 0.03 |
| <b>Proteobacteria/Comamonadaceae</b>     | <i>Acidovorax</i> sp              | 0.03  | 0.04  | 0.07  | 0.05  | 0.00  | 0.36  | 0.21  | 0.11 |
|                                          | <i>Hydrogenophaga intermedia</i>  | 1.79  | 0.16  | 0.07  | 0.07  | 1.45  | 1.71  | 0.33  | 0.28 |
|                                          | <i>Pseudorhodoferax</i>           | 0.00  | 0.03  | 0.12  | 0.08  | 0.00  | 0.00  | 0.49  | 0.40 |
|                                          | <i>Variovorax</i>                 | 1.42  | 0.10  | 0.04  | 0.00  | 1.11  | 0.42  | 0.01  | 0.04 |
| <b>Proteobacteria/Oxalobacteraceae</b>   | <i>Duganella</i> sp               | 1.16  | 0.20  | 0.18  | 0.06  | 7.87  | 4.61  | 0.09  | 0.10 |
|                                          | <i>Herbaspirillum</i>             | 0.11  | 0.00  | 0.00  | 0.00  | 0.02  | 0.07  | 0.03  | 0.02 |
|                                          | <i>Massilia</i> sp                | 1.93  | 0.15  | 0.04  | 0.00  | 1.65  | 0.97  | 0.00  | 0.03 |
|                                          | <i>Massilia</i> unk               | 0.29  | 0.03  | 0.06  | 0.09  | 0.39  | 0.01  | 0.01  | 0.09 |
| <b>Proteobacteria/Rhodocyclaceae</b>     | <i>Methyloversatilis</i> sp       | 0.11  | 0.00  | 0.00  | 0.00  | 0.27  | 0.22  | 0.00  | 0.00 |
| <b>Proteobacteria/Cellvibrionaceae</b>   | <i>Cellvibrio</i> sp              | 0.00  | 0.74  | 2.00  | 0.60  | 0.00  | 0.01  | 0.73  | 0.13 |
|                                          | <i>Cellvibrio</i> unk             | 0.01  | 0.16  | 0.18  | 0.16  | 0.00  | 1.39  | 0.52  | 0.18 |
| <b>Proteobacteria/Enterobacteriaceae</b> | <i>Pantoea agglomerans</i>        | 3.24  | 0.17  | 0.14  | 0.64  | 10.24 | 1.66  | 15.56 | 0.16 |
| <b>Proteobacteria/Pseudomonadaceae</b>   | <i>Pseudomonas</i> sp             | 34.78 | 67.14 | 53.68 | 75.57 | 2.64  | 23.45 | 0.53  | 0.61 |
|                                          | <i>Pseudomonas</i> unk            | 1.00  | 0.25  | 0.27  | 1.61  | 0.16  | 1.86  | 4.99  | 0.14 |
| <b>Proteobacteria/Xanthomonadaceae</b>   | <i>Lysobacter yangpyeongensis</i> | 1.01  | 0.23  | 0.14  | 0.03  | 0.59  | 0.51  | 0.09  | 0.06 |
|                                          | <i>Pseudoxanthomonas</i> sp       | 0.08  | 0.08  | 0.08  | 0.09  | 0.12  | 0.04  | 0.22  | 0.37 |
|                                          | <i>Stenotrophomonas</i> sp        | 0.13  | 0.33  | 0.23  | 1.52  | 0.09  | 0.27  | 1.96  | 1.64 |
|                                          | <i>Xanthomonadaceae</i> unk       | 0.86  | 0.25  | 0.10  | 0.08  | 1.34  | 0.64  | 0.07  | 0.05 |
| <b>Tenericutes/Acoleplasmataceae</b>     | <i>Sugarcane phytoplasma</i>      | 3.68  | 2.17  | 2.10  | 1.35  | 1.98  | 5.67  | 5.14  | 2.77 |

<sup>a</sup> Only OTUs with a relative abundance > 0.1% in at least one thesis are shown.
